# Supplementary material for: Meningioma Genomics: Diagnostic, Prognostic, and Therapeutic Applications
Source: PubMed Central journal article supplement (PMC4933705; doi:10.3389/fsurg.2016.00040), 2016-07-06
Supplement: table_1.pdf [file table_1.pdf]

**Supplementary Table 1. Genetic alterations associated with meningioma histologic subtypes.**

| <b>Subtype</b>             | <b>Associated Genetic Alteration</b> | <b>Inheritance Pattern</b> |
|----------------------------|--------------------------------------|----------------------------|
| Meningothelial             | <i>AKT</i> (E17K)                    | Sporadic                   |
| Fibroblastic, Transitional | <i>NF2</i>                           | Sporadic, Familial         |
| Secretory                  | <i>KLF4</i> (K409Q), <i>TRAF7</i>    | Sporadic                   |
| Angiomatous                | Polysomy 5                           | Sporadic                   |
| Clear cell                 | <i>SMARCE1</i>                       | Familial                   |
